# Supplementary material for: Carbon Nanotube Fibers Decorated with MnO2 for Wire-Shaped Supercapacitor
Source: MDPI journal article supplement (doi:10.3390/molecules26113479), 2021-06-07
Supplement: s1 [file s1]

# Supplementary information

## Carbon nanotube fibers decorated with MnO<sub>2</sub> for wire-shaped supercapacitor

Luman Zhang <sup>1</sup>, Xuan Zhang <sup>1,\*</sup>, Jian Wang <sup>2</sup>, David Seveno <sup>1</sup>, Jan Fransaer <sup>1</sup>, Jean-Pierre Locquet <sup>3</sup> and Jin Won Seo <sup>1,\*</sup>

1 Department of Materials Engineering, KU Leuven, Kasteelpark Arenberg 44 – bus 2450, B-3001 Leuven, Belgium

E-mail: lumanzhang1990@gmail.com. E-mail: xuan.zhang@kuleuven.be. E-mail: david.seveno@kuleuven.be. E-mail: jan.fransaer@kuleuven.be. E-mail: maria.seo@kuleuven.be.

2 Industrial Research Institute of Nonwovens & Technical Textile, College of Textiles & Clothing, Qingdao 266071, China

E-mail: wj8958@163.com

3 Department of Physics and Astronomy, KU Leuven, Celestijnenlaan 200D, B-3001 Leuven, Belgium

E-mail: jeanpierre.locquet@kuleuven.be

\* Author to whom correspondence should be addressed.

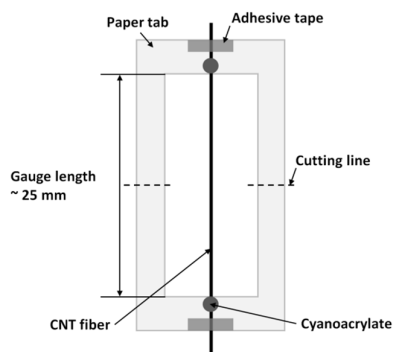

Figure S1. Specimen for single fiber tensile test.

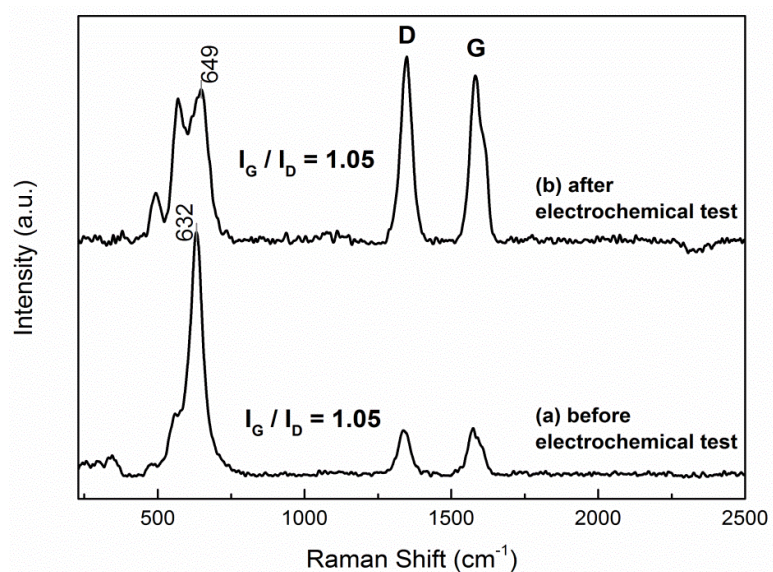

**Figure S2.** Raman spectra of CNT-MnO<sub>2</sub> fiber (10, 8) (a) before and (b) after electrochemical tests.

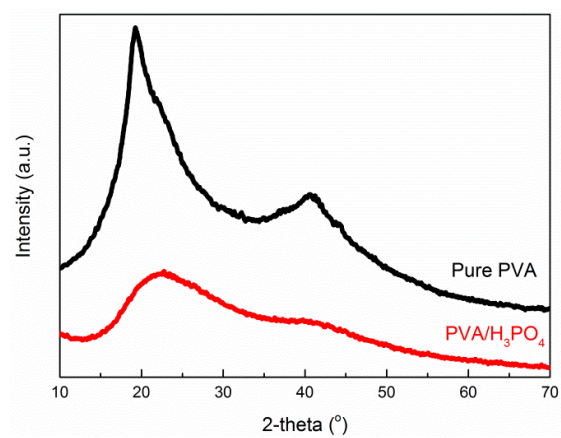

**Figure S3.** XRD analysis of the solid polymer electrolyte based on PVA.

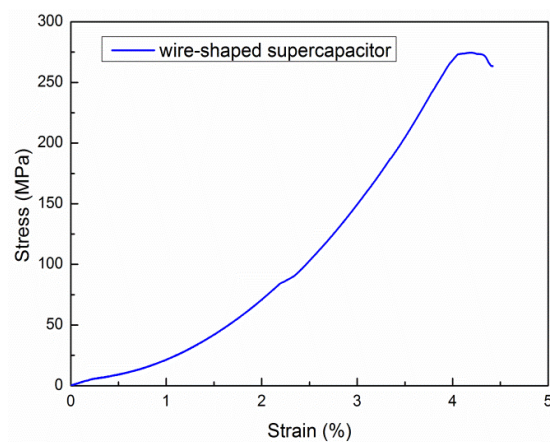

**Figure S4.** Strength-strain curve of the tested wire-shaped supercapacitor.

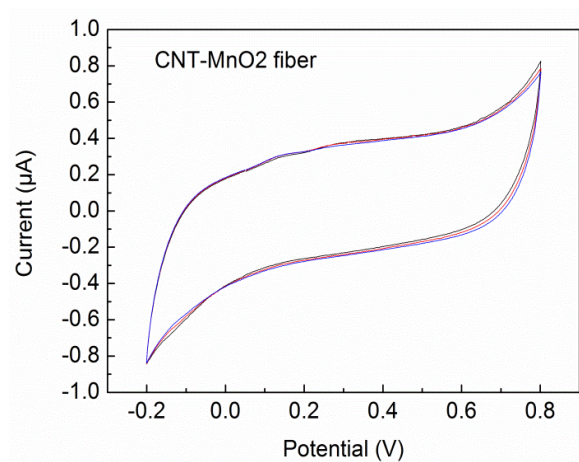

**Figure S5.** A non-quasi-rectangular CV curve of a CNT-MnO<sub>2</sub> fiber electrode, operating voltage window: -0.2 – 0.8V.
